# Supplementary material for: Fermentation in Pineapple Juice Significantly Enhances Ornithine and Citrulline Production in Lactococcus lactis MSC-3G Isolated from Sugarcane
Source: MDPI journal article supplement (doi:10.3390/microorganisms10050962), 2022-05-03
Supplement: s1 [file s1]

Table S1. Carbohydrate utilization profile of MSC-3G.

| Characteristic                     | Results |
|------------------------------------|---------|
| Carbon source fermentability       |         |
| Glycerol                           | -       |
| Erythritol                         | -       |
| D-Arabinose                        | -       |
| L-Arabinose                        | +       |
| D-Ribose                           | +       |
| D-Xylose                           | +       |
| L-Xylose                           | -       |
| D-Adonitol                         | -       |
| Methyl- $\beta$ D-xylopyranoside   | -       |
| D-Galactose                        | +       |
| D-Glucose                          | +       |
| D-Fructose                         | +       |
| D-Mannose                          | +       |
| L-Sorbose                          | -       |
| L-Rhamnose                         | -       |
| Dulcitol                           | -       |
| Inositol                           | -       |
| D-Mannitol                         | +       |
| D-Sorbitol                         | -       |
| Methyl- $\alpha$ D-mannopyranoside | -       |
| Methyl- $\alpha$ D-glucoyranoside  | -       |
| N-Acetyl glucosamine               | +       |
| Amygdalin                          | +       |
| Arbutin                            | +       |
| Esculin ferric citrate             | -       |
| Salicin                            | +       |
| D-Cellobiose                       | +       |
| D-Maltose                          | +       |
| D-Lactose                          | +       |
| D-Melibiose                        | -       |
| D-Sucrose                          | +       |
| D-trehalose                        | +       |
| Inulin                             | -       |

|                 |   |
|-----------------|---|
| D-Melezitose    | - |
| D-Raffinose     | - |
| Starch          | + |
| Glycogen        | - |
| Xylitol         | - |
| Gentiobiose     | + |
| D-turanose      | - |
| D-Lyxose        | - |
| D-Tagarose      | - |
| D-Fucose        | - |
| D-Arabitol      | - |
| Gluconate       | + |
| 2-Ketogluconate | - |
| 5-Ketogluconate | - |

---
